# Supplementary material for: Mating in wild yeast: delayed interest in sex after spore germination
Source: PubMed Central journal article supplement — Mol Biol Cell. 2018 Dec 15;29(26):3119–27. doi: 10.1091/mbc.E18-08-0528 (PMC6340204; doi:10.1091/mbc.e18-08-0528), 2018-12-15
Supplement: mbc-29-3119-s001.pdf [file mbc-29-3119-s001.pdf]

# Supplemental Materials

*Molecular Biology of the Cell*

McClure et al.



## Supplemental Experimental Procedures

### Yeast strains and plasmids

Yeast strains and plasmids were constructed using standard molecular genetic procedures and are listed in the tables below. Wild strains are listed, and the two lab strains are BF264-15Du (Richardson et al., 1989) and YEF473 (Bi and Pringle, 1996).

The following have been previously described: *BEM1-GFP* (Howell et al., 2009) and *rsr1::kan<sup>R</sup>*, *HTB2-mCherry* and *GFP-Ste4* (McClure et al., 2015). *STE2-mCherry* (DLB4299) was made by amplifying mCherry using primers that added flanking NotI sites and ligating into DLB3859 as well as using PvuII to change the marker to *nat<sup>R</sup>* (McClure et al., 2015). *MF $\alpha$ 1* was replaced with GFP using the PCR-based method (Baudin et al., 1993) and using pFA6a-GFP(S65T)-KanMX6 as a template. *P<sub>MF $\alpha$ 1</sub>-PSRI-GFP-T<sub>ADH1</sub>:kan<sup>R</sup>* (DLB4273) was made by altering a plasmid from (Kuo et al., 2014) by amplifying *P<sub>MF $\alpha$ 1</sub>* using flanking ApaI and HindIII sites and changing the marker to *kan<sup>R</sup>*. *Psrl* sequences (first 28 residues) target the protein to the plasma membrane. The plasmid was integrated at the *ADH1* locus using SphI. *P<sub>TEF1</sub>-PSRI-GFP-T<sub>ADH1</sub>* was made similarly by amplifying *P<sub>TEF1</sub>* using ApaI and HindIII sites, and integrated into yeast at the *leu2* locus using PpuMI. *P<sub>TDH3</sub>-YFP* was a kind gift from N. Buchler, and the marker was changed to *kan<sup>R</sup>* using PvuII to make DLB4240. It was integrated at the *TDH3* locus using AccI. *STE20-mCherry* was made using the PCR-based method using pFA6a-mCherry-hph<sup>R</sup> as a template.

Supplemental Table S1. Strains list

| <i>strain</i> | <i>background</i> | <i>genotype<sup>1</sup></i>                                                                                               | <i>source</i>       | <i>original isolation</i>            |
|---------------|-------------------|---------------------------------------------------------------------------------------------------------------------------|---------------------|--------------------------------------|
| DLY19552      | YJM1418           |                                                                                                                           | Strope et al., 2015 | oak tree in Japan                    |
| DLY19554      | YJM1444           |                                                                                                                           | Strope et al., 2015 | prickly pear in Hawaii, USA          |
| DLY19556      | YJM1338           |                                                                                                                           | Strope et al., 2015 | sour fig in Maryland, USA            |
| DLY19557      | YJM451            |                                                                                                                           | Strope et al., 2015 | clinical sample from UK              |
| DLY19659      | YJM1399           |                                                                                                                           | Strope et al., 2015 | cherry tree from unknown location    |
| DLY19660      | YJM1252           |                                                                                                                           | Strope et al., 2015 | waste water from Spain               |
| DLY19661      | YJM1400           |                                                                                                                           | Strope et al., 2015 | guava from Phillipines               |
| DLY19663      | YJM554            |                                                                                                                           | Strope et al., 2015 | clinical sample from California, USA |
| DLY19664      | YJM1386           |                                                                                                                           | Strope et al., 2015 | sugar cane juice from Jamaica        |
| DLY19740      | YJM1386           | <i>MATa<math>\alpha</math></i> , <i>TDH3:P<sub>TDH3</sub>-YFP-T<sub>ADH1</sub>:kan<sup>R</sup></i>                        | this study          |                                      |
| DLY19741      | YJM1386           | <i>MATa<math>\alpha</math></i> , <i>HTB2-mCherry:nat<sup>R</sup></i>                                                      | this study          |                                      |
| DLY20210      | YJM451            | <i>MATa<math>\alpha</math></i> , <i>ADH1:P<sub>MF<math>\alpha</math>1</sub>-PSRI-GFP-T<sub>ADH1</sub>:kan<sup>R</sup></i> | this study          |                                      |
| DLY20288      | YJM1399           | <i>MATa<math>\alpha</math></i> , <i>ADH1:P<sub>MF<math>\alpha</math>1</sub>-PSRI-GFP-T<sub>ADH1</sub>:kan<sup>R</sup></i> | this study          |                                      |
| DLY20651      | YJM1418           | <i>MATa<math>\alpha</math></i> , <i>ADH1:P<sub>MF<math>\alpha</math>1</sub>-PSRI-GFP-T<sub>ADH1</sub>:kan<sup>R</sup></i> | this study          |                                      |
| DLY20653      | YJM1400           | <i>MATa<math>\alpha</math></i> , <i>ADH1:P<sub>MF<math>\alpha</math>1</sub>-PSRI-GFP-T<sub>ADH1</sub>:kan<sup>R</sup></i> | this study          |                                      |
| DLY20655      | YJM1338           | <i>MATa<math>\alpha</math></i> , <i>ADH1:P<sub>MF<math>\alpha</math>1</sub>-PSRI-GFP-T<sub>ADH1</sub>:kan<sup>R</sup></i> | this study          |                                      |
| DLY20657      | YJM1444           | <i>MATa<math>\alpha</math></i> , <i>ADH1:P<sub>MF<math>\alpha</math>1</sub>-PSRI-GFP-T<sub>ADH1</sub>:kan<sup>R</sup></i> | this study          |                                      |
| DLY20659      | YJM1252           | <i>MATa<math>\alpha</math></i> , <i>ADH1:P<sub>MF<math>\alpha</math>1</sub>-PSRI-GFP-T<sub>ADH1</sub>:kan<sup>R</sup></i> | this study          |                                      |

|                       |            |                                                                                 |                      |
|-----------------------|------------|---------------------------------------------------------------------------------|----------------------|
| DLY20748              | YJM554     | <i>MATa/α, ADH1:P<sub>MFa1</sub>-PSR1-GFP-T<sub>ADH1</sub>:kan<sup>R</sup></i>  | this study           |
| DLY20845              | YJM1386    | <i>MATa/α, ADH1:P<sub>MFa1</sub>-PSR1-GFP-T<sub>ADH1</sub>:kan<sup>R</sup></i>  | this study           |
| DLY22729              | YEF473     | <i>MATa/α, ADH1:P<sub>MFa1</sub>-PSR1-GFP-T<sub>ADH1</sub>:kan<sup>R</sup></i>  | this study           |
| DLY18930 <sup>2</sup> | YEF473     | <i>MATa/α, leu2:P<sub>TEF1</sub>-PSR1-GFP-T<sub>ADH1</sub>:LEU2, rsr1::TRP1</i> | this study           |
| DLY20920              | YJM1386    | <i>MATa/α, STE2-mCherry:nat<sup>R</sup>, MFa1::GFP:kan<sup>R</sup></i>          | this study           |
| DLY20922              | YJM451     | <i>MATa/α, STE2-mCherry:nat<sup>R</sup>, MFa1::GFP:kan<sup>R</sup></i>          | this study           |
| DLY20923              | YJM554     | <i>MATa/α, STE2-mCherry:nat<sup>R</sup>, MFa1::GFP:kan<sup>R</sup></i>          | this study           |
| DLY20931              | YJM1418    | <i>MATa/α, STE2-mCherry:nat<sup>R</sup>, MFa1::GFP:kan<sup>R</sup></i>          | this study           |
| DLY20932              | YJM1252    | <i>MATa/α, STE2-mCherry:nat<sup>R</sup>, MFa1::GFP:kan<sup>R</sup></i>          | this study           |
| DLY21020              | YJM1399    | <i>MATa/α, STE2-mCherry:nat<sup>R</sup>, MFa1::GFP:kan<sup>R</sup></i>          | this study           |
| DLY22160              | YJM1444    | <i>MATa/α, STE2-mCherry:nat<sup>R</sup>, MFa1::GFP:kan<sup>R</sup></i>          | this study           |
| DLY22161              | YJM1338    | <i>MATa/α, STE2-mCherry:nat<sup>R</sup>, MFa1::GFP:kan<sup>R</sup></i>          | this study           |
| DLY19805              | YEF473     | <i>MATa/α, STE20-mCherry:hph<sup>R</sup>, BEM1-GFP:LEU2</i>                     | this study           |
| DLY16019              | BF264-15Du | <i>MATa/α, GFP-STE4, rsr1::kan<sup>R</sup>, bar1</i>                            | McClure et al., 2015 |

<sup>1</sup>genotypes are homozygous except for those noted

<sup>2</sup>heterozygous genotype

### Supplemental references

- Baudin, A., Ozier-Kalogeropoulos, O., Denouel, A., Lacroute, F., and Cullin, C. (1993). A simple and efficient method for direct gene deletion in *Saccharomyces cerevisiae*. *Nucleic Acids Res* 21, 3329–3330.
- Bi, E., and Pringle, J.R. (1996). ZDS1 and ZDS2, genes whose products may regulate Cdc42p in *Saccharomyces cerevisiae*. *Mol. Cell. Biol.* 16, 5264–5275.
- Howell, A.S., Savage, N.S., Johnson, S.A., Bose, I., Wagner, A.W., Zyla, T.R., Nijhout, H.F., Reed, M.C., Goryachev, A.B., and Lew, D.J. (2009). Singularity in polarization: rewiring yeast cells to make two buds. *Cell* 139, 731–743.
- Kuo, C.C., Savage, N.S., Chen, H., Wu, C.F., Zyla, T.R., and Lew, D.J. (2014). Inhibitory GEF Phosphorylation Provides Negative Feedback in the Yeast Polarity Circuit. *Curr Biol* 24, 753–759.
- McClure, A.W., Minakova, M., Dyer, J.M., Zyla, T.R., Elston, T.C., and Lew, D.J. (2015). Role of Polarized G Protein Signaling in Tracking Pheromone Gradients. *Dev. Cell* 35, 471–482.
- Richardson, H.E., Wittenberg, C., Cross, F., and Reed, S.I. (1989). An Essential G1 Function for Cyclin-like Proteins in Yeast. *Cell* 59, 1127–1133.
- Strope, P.K., Skelly, D. a, Kozmin, S.G., Mahadevan, G., Stone, E. a, Magwene, P.M., Dietrich, F.S., and McCusker, J.H. (2015). The 100-genomes strains , an *S. cerevisiae* resource that illuminates its natural phenotypic and genotypic variation and emergence as an opportunistic pathogen. *Genome Res.* 25, 762–774.
